# Supplementary material for: Emulator-based Bayesian calibration of the CISNET colorectal cancer models
Source: bioRxiv or medRxiv preprint supplement (doi:10.1101/2023.02.27.23286525), 2024-02-05
Supplement: Supplementary file [file media-1.pdf]

Supplementary material to “Emulator-based Bayesian calibration of the CISNET  
colorectal cancer models.”

Figure S1. Model outputs coverage of targets

*S1.1 SimCRC*

**SimCRC targets coverage**

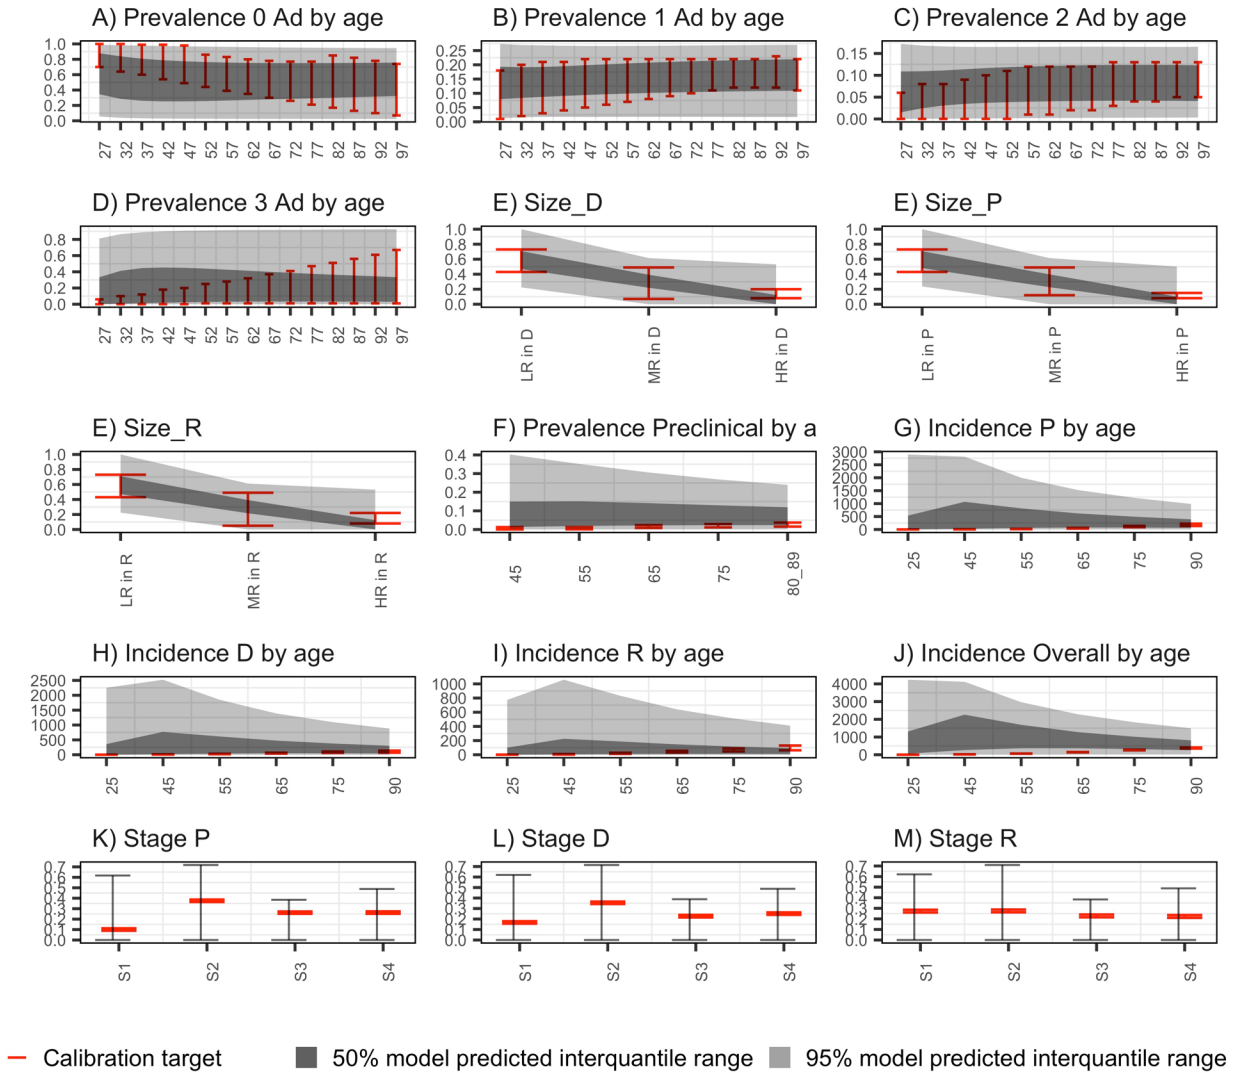

## S1.2 MISCAN-Colon

### MISCAN targets coverage

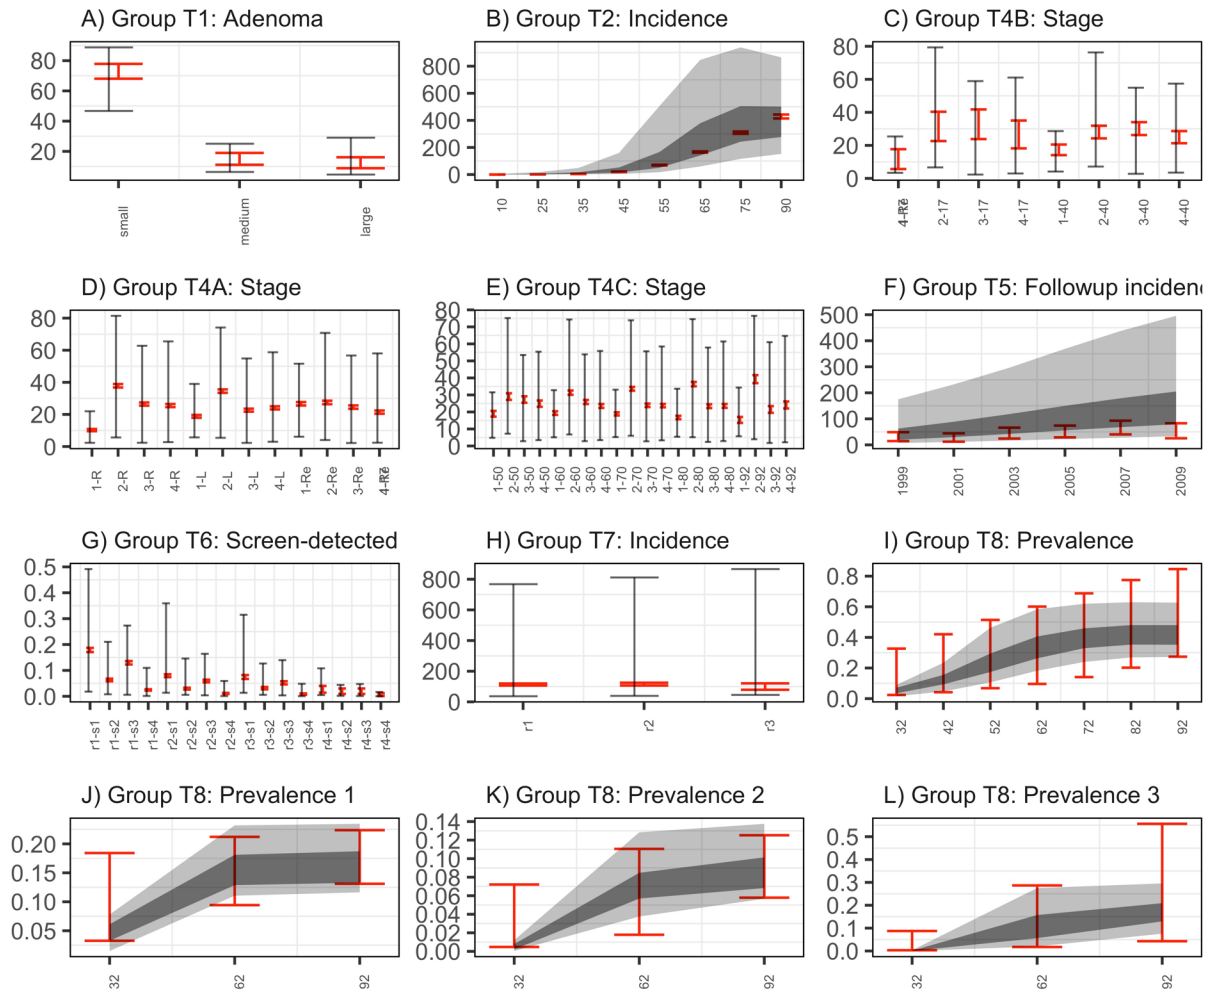

— Calibration target    ■ 50% model predicted interquartile range    ■ 95% model predicted interquartile range

### SI.3 CRC-SPIN

#### CRC SPIN target coverage

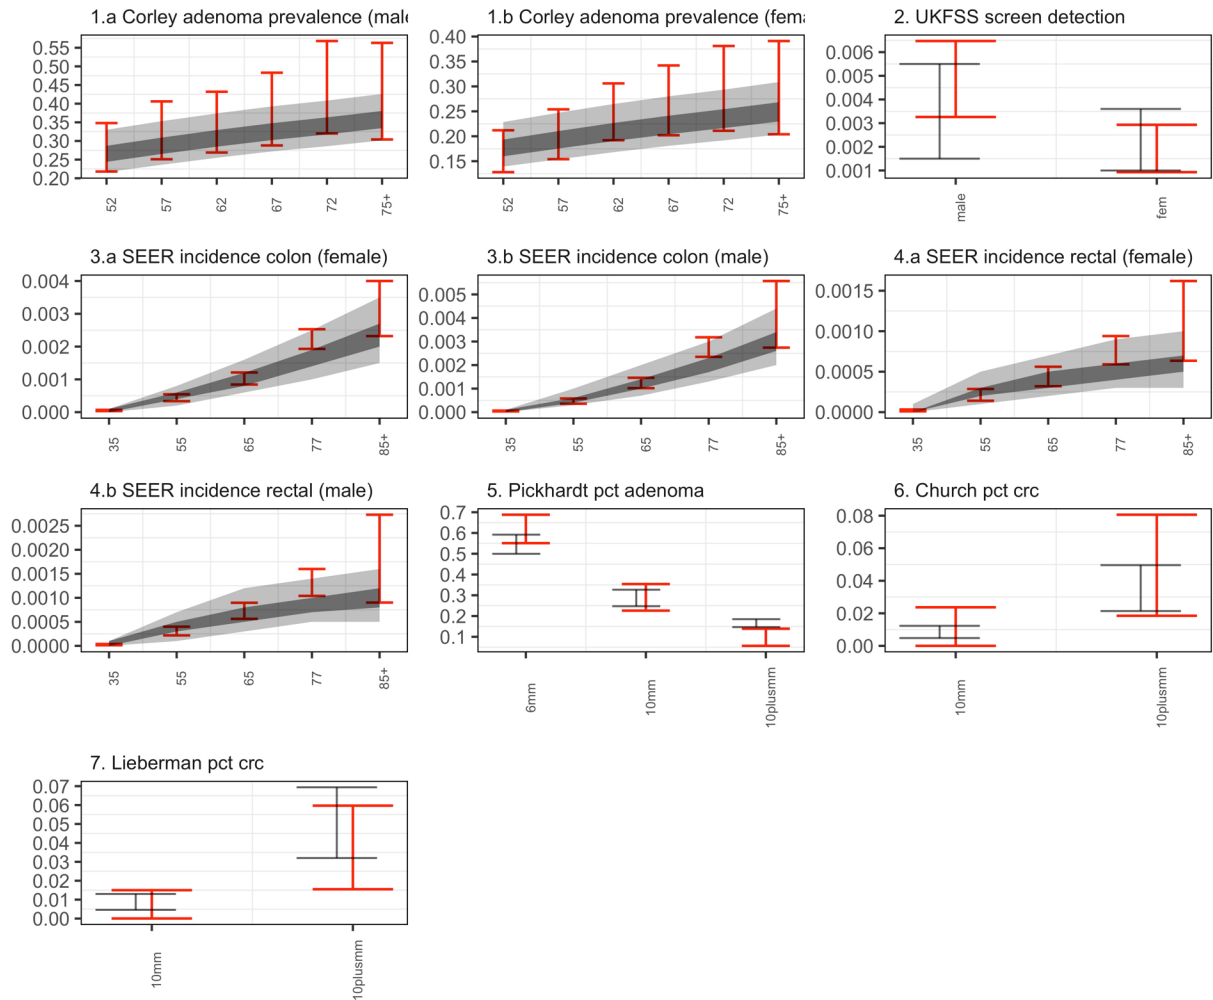

— Calibration target    ■ 50% model predicted interquartile range    ■ 95% model predicted interquartile range

**Figure S2. R-hat values for convergence diagnostic and Effective-sample size for efficiency diagnostic.**

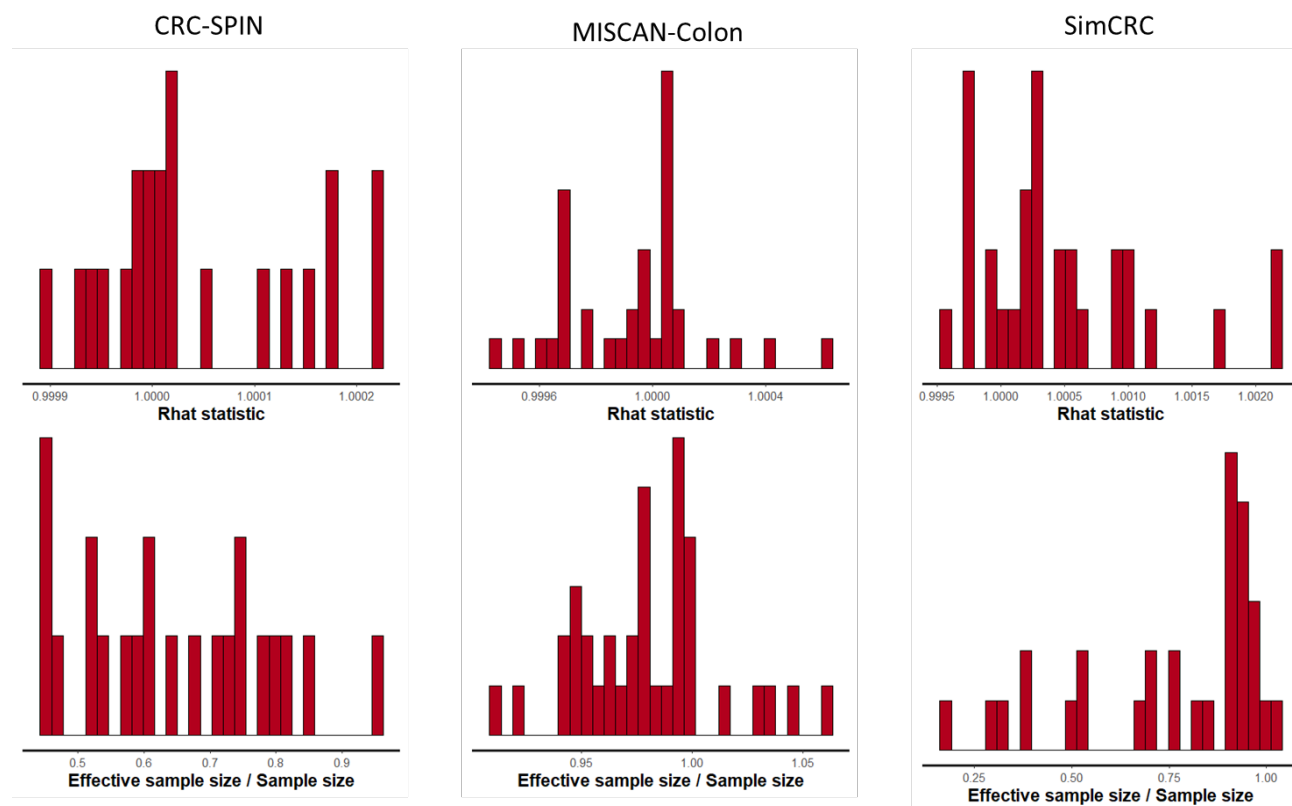



**Figure S3. Prior and posterior distributions of the calibrated input parameters for the three CISNET-CRC models**

***S3.1 SimCRC***

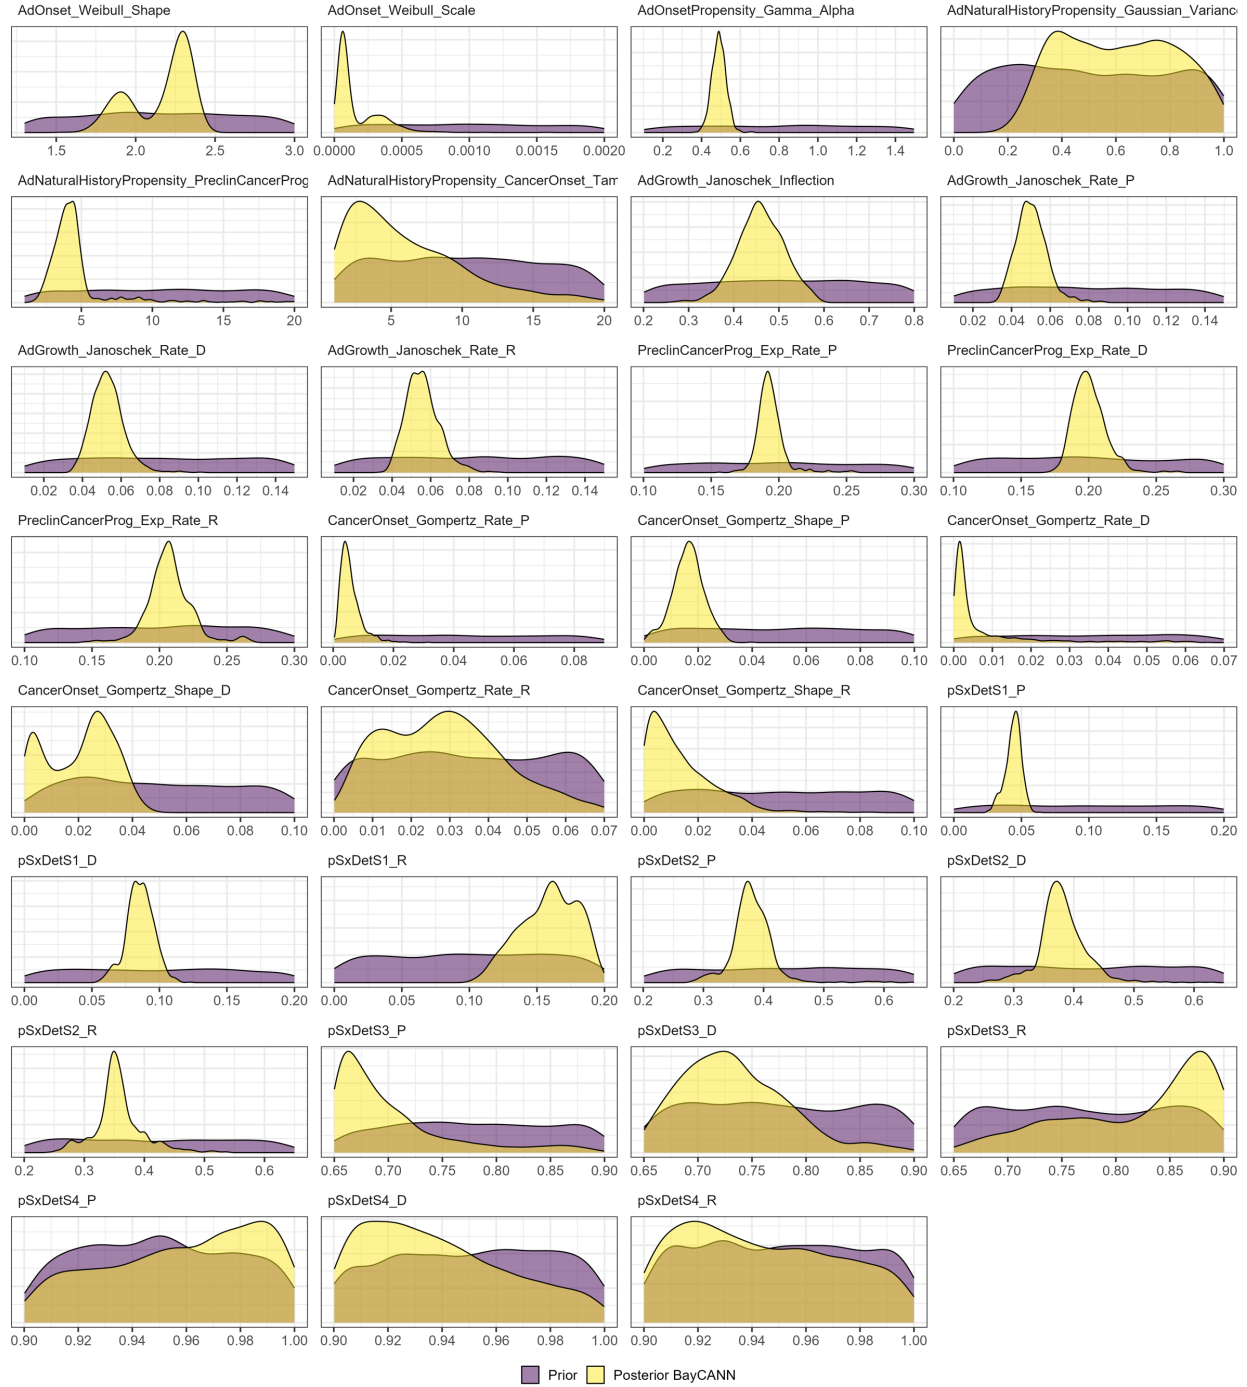

### S3.2 MISCAN-Colon

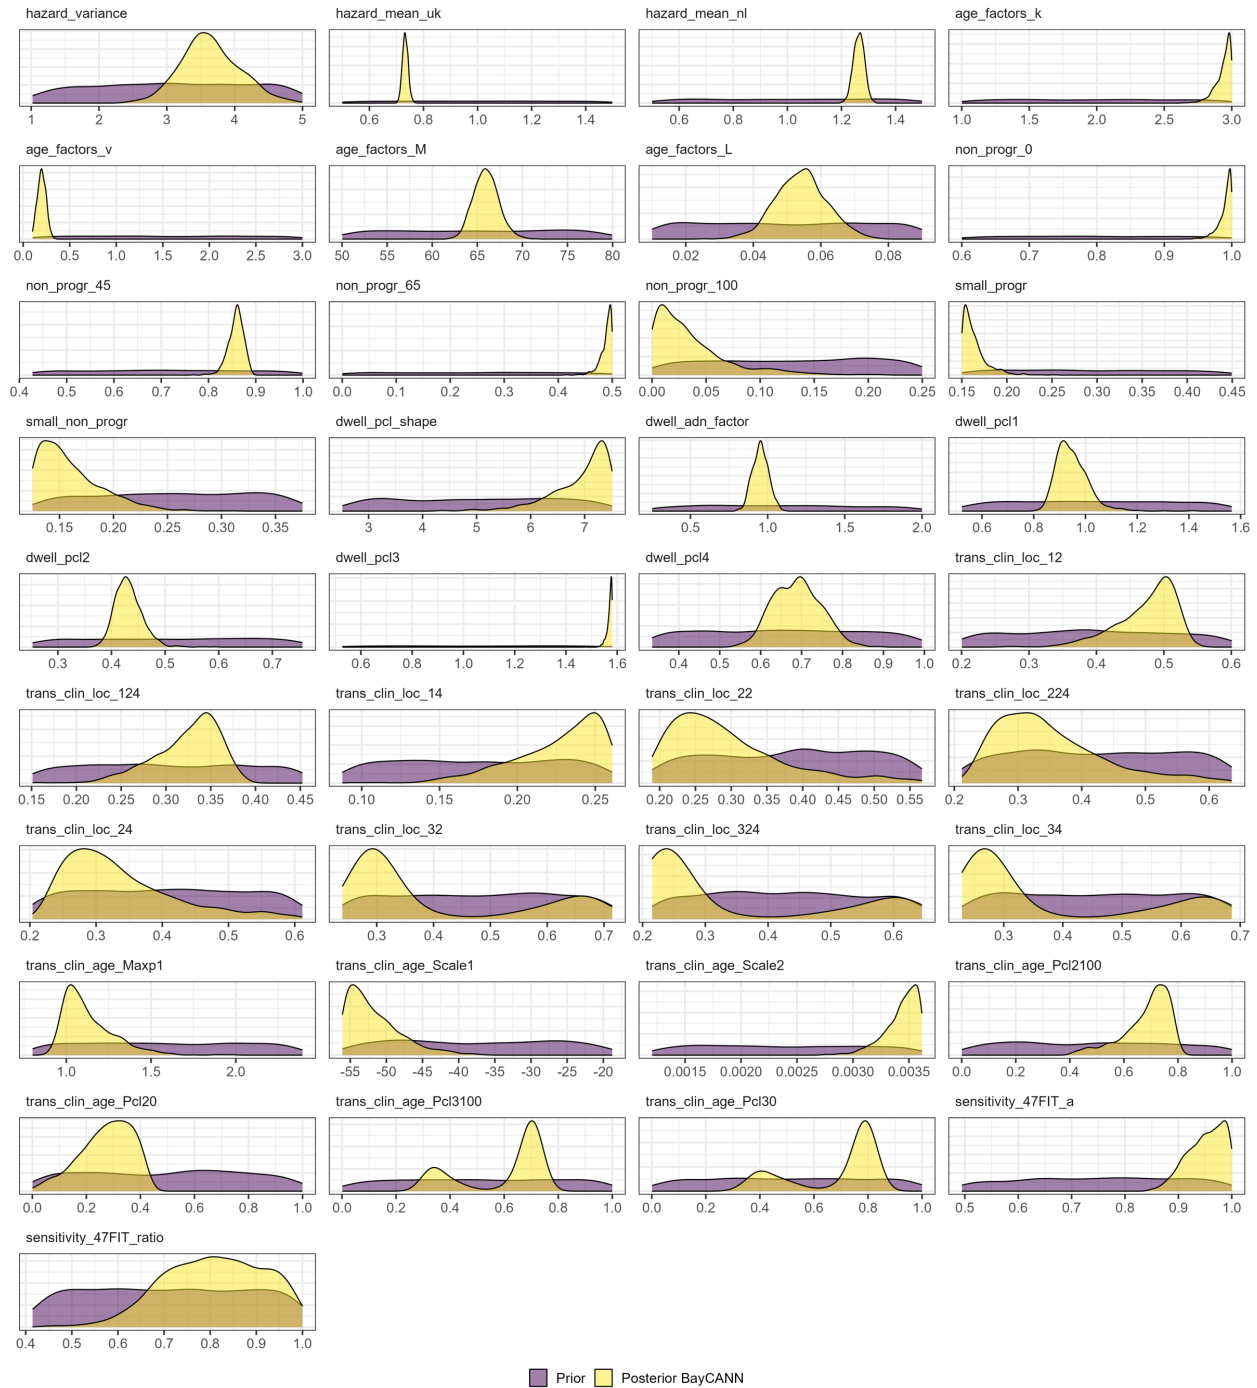

### S3.3 CRC-SPIN

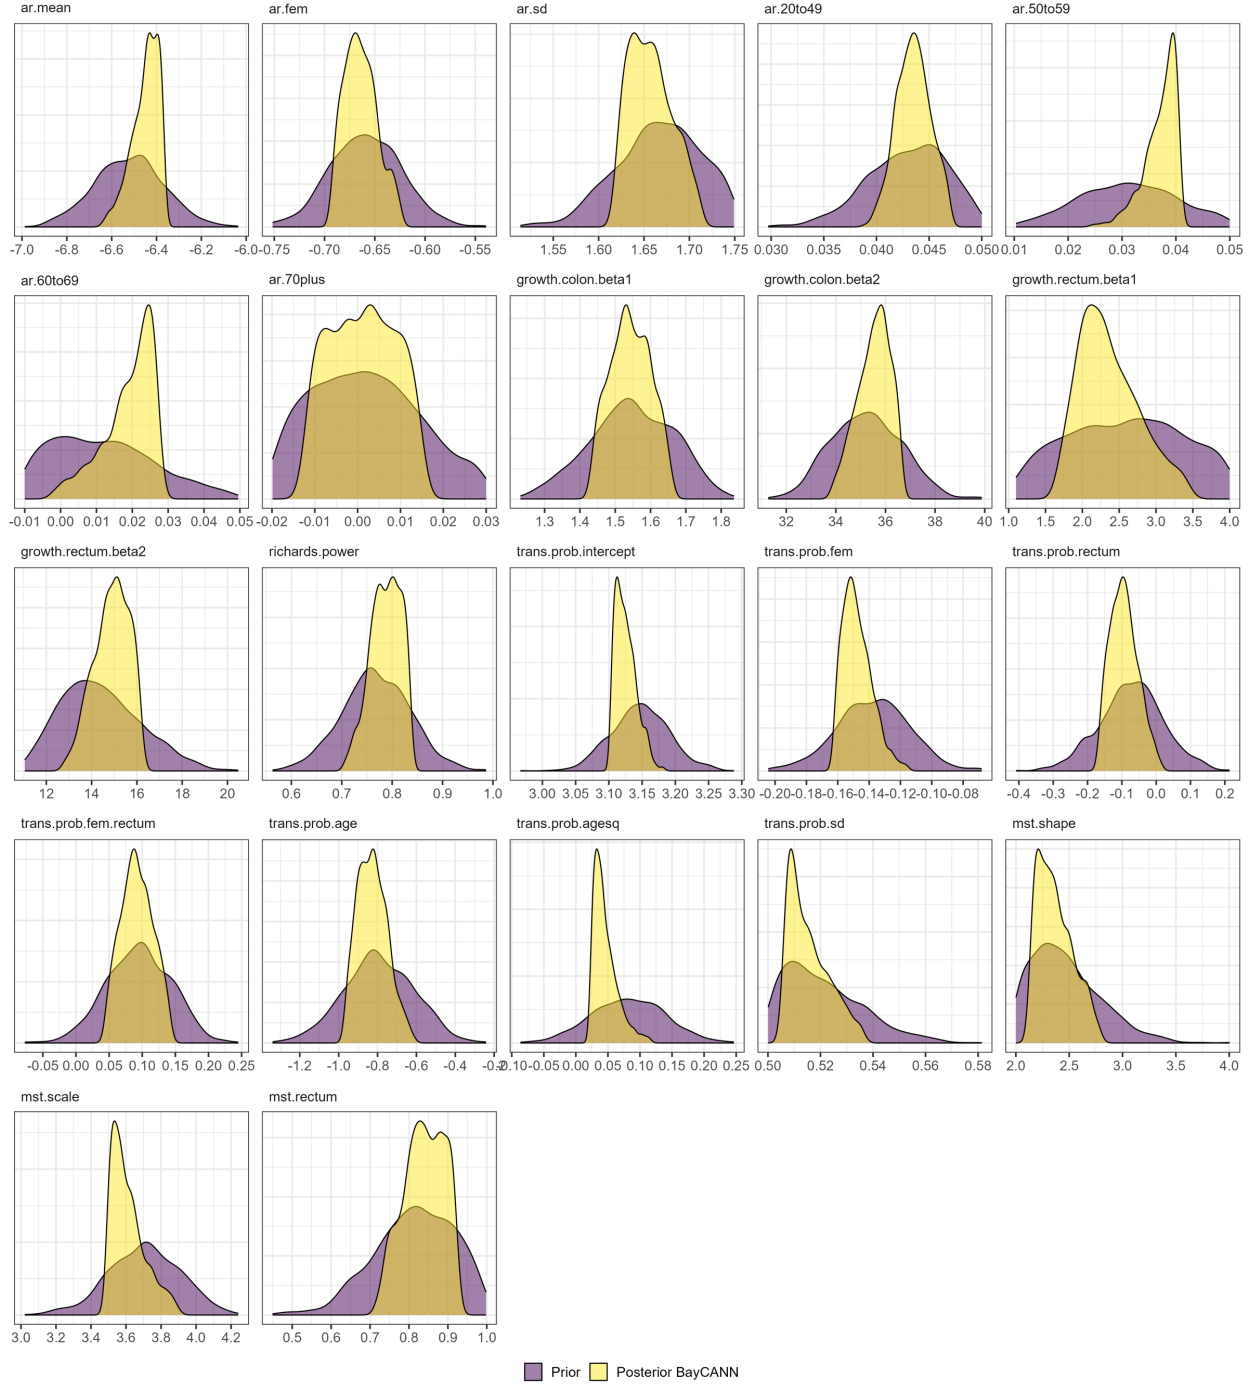

Note: Originally, the prior distributions of CRC-SPIN were set as uniform. However, due to the LHS draws stopping early when predictions fall out of range, this generates a non-uniform prior distribution.

**Figure S4. Joint posterior distribution of the calibrated input parameters for the three CISNET-CRC models.**

### S4.1 SimCRC

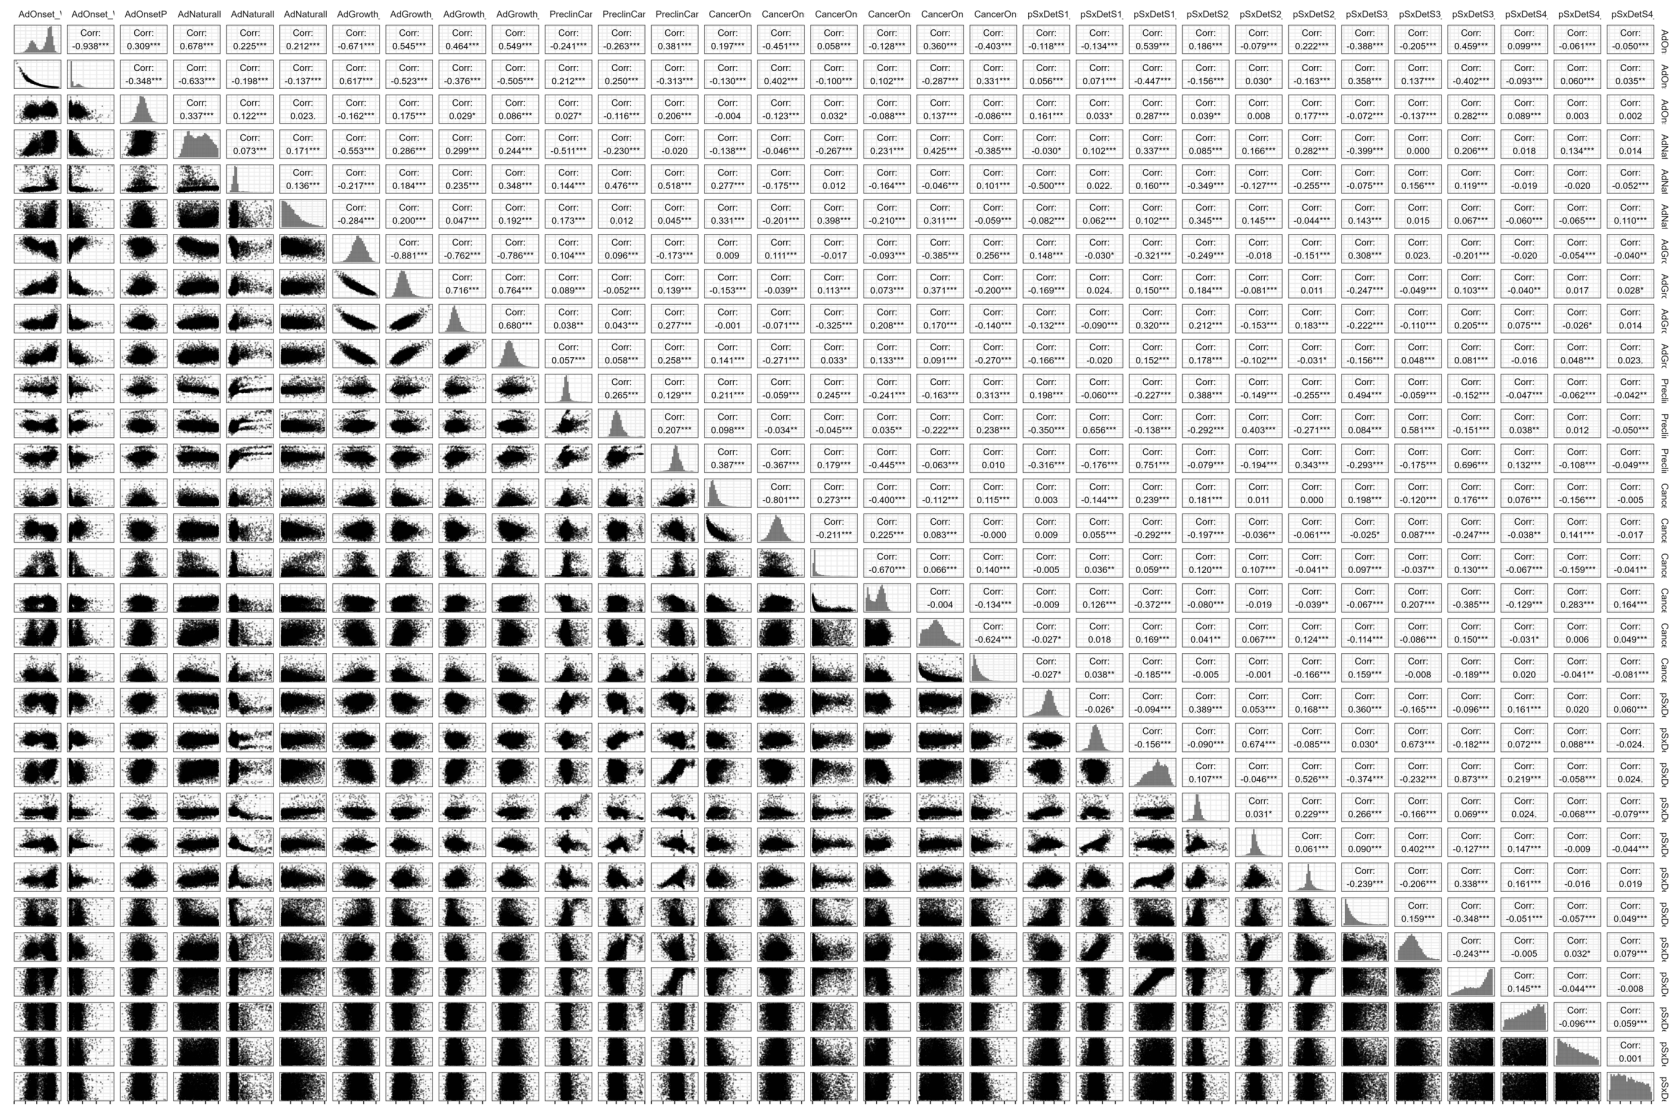

### ***S4.2 MISCAN-Colon***

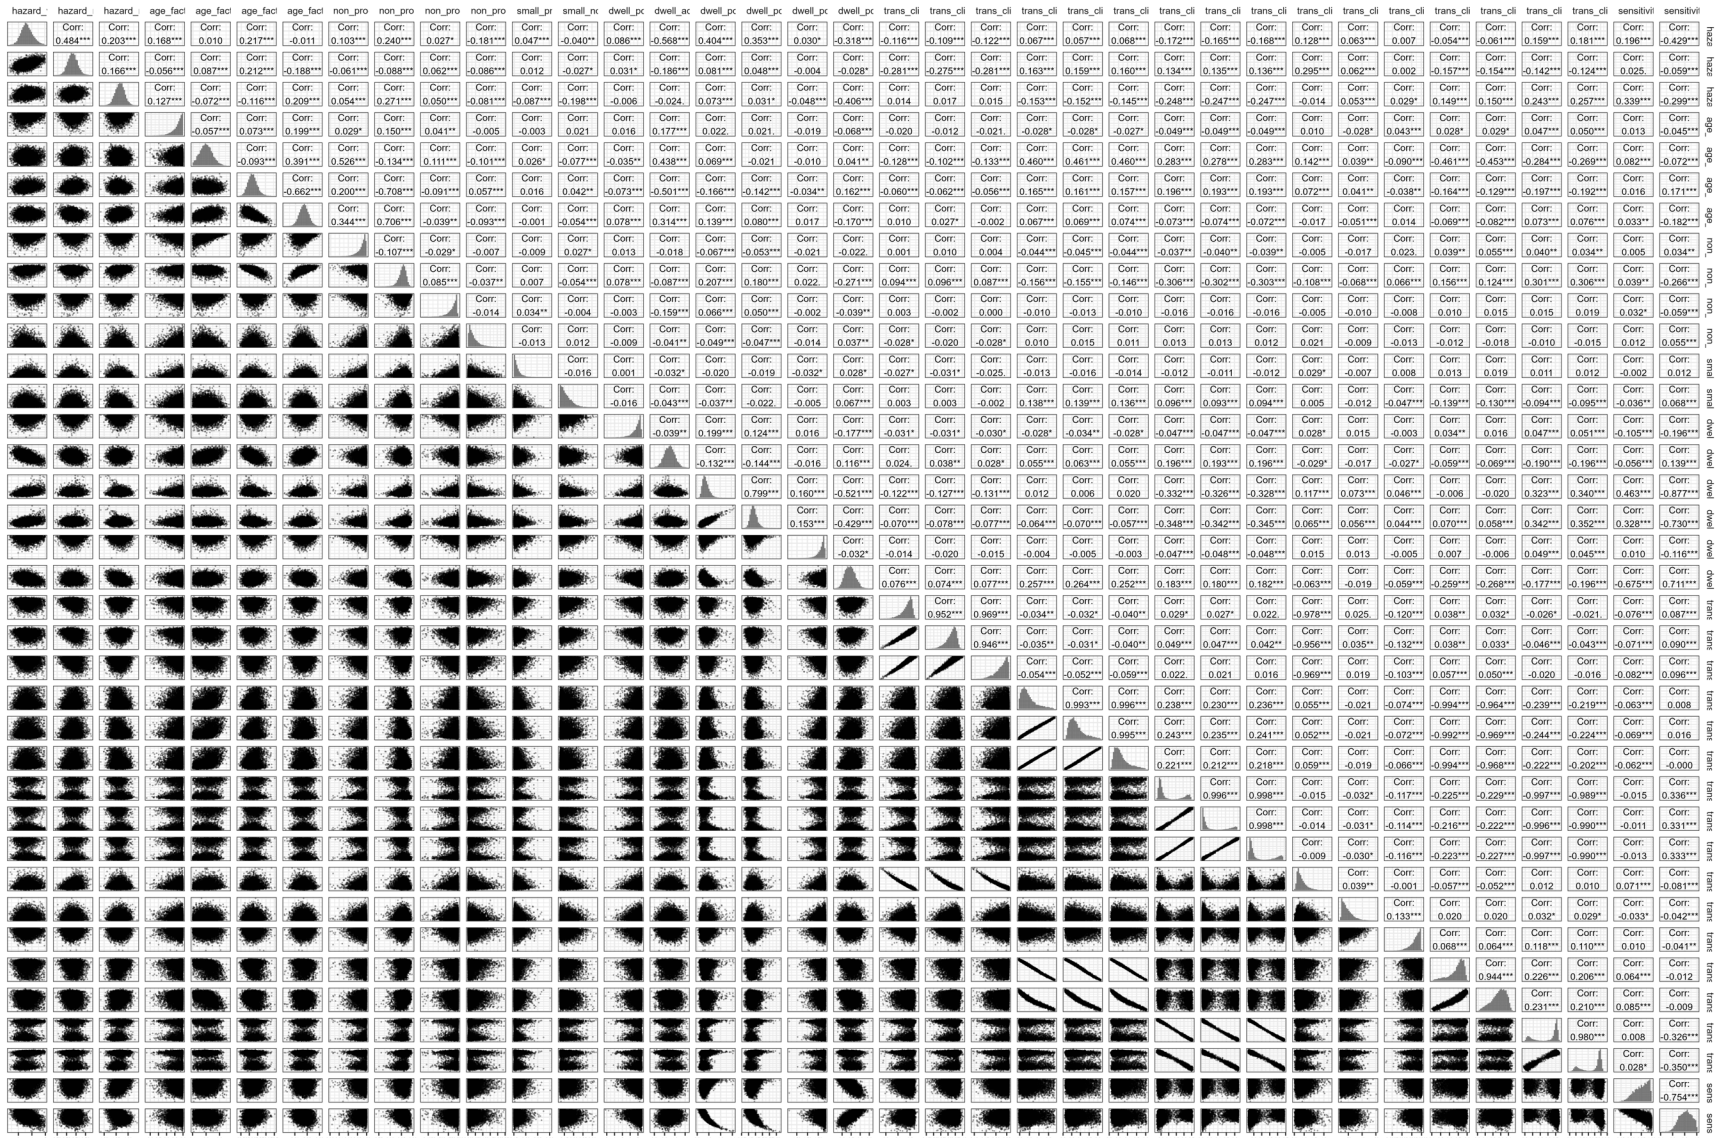



### S4.3 CRC-SPIN

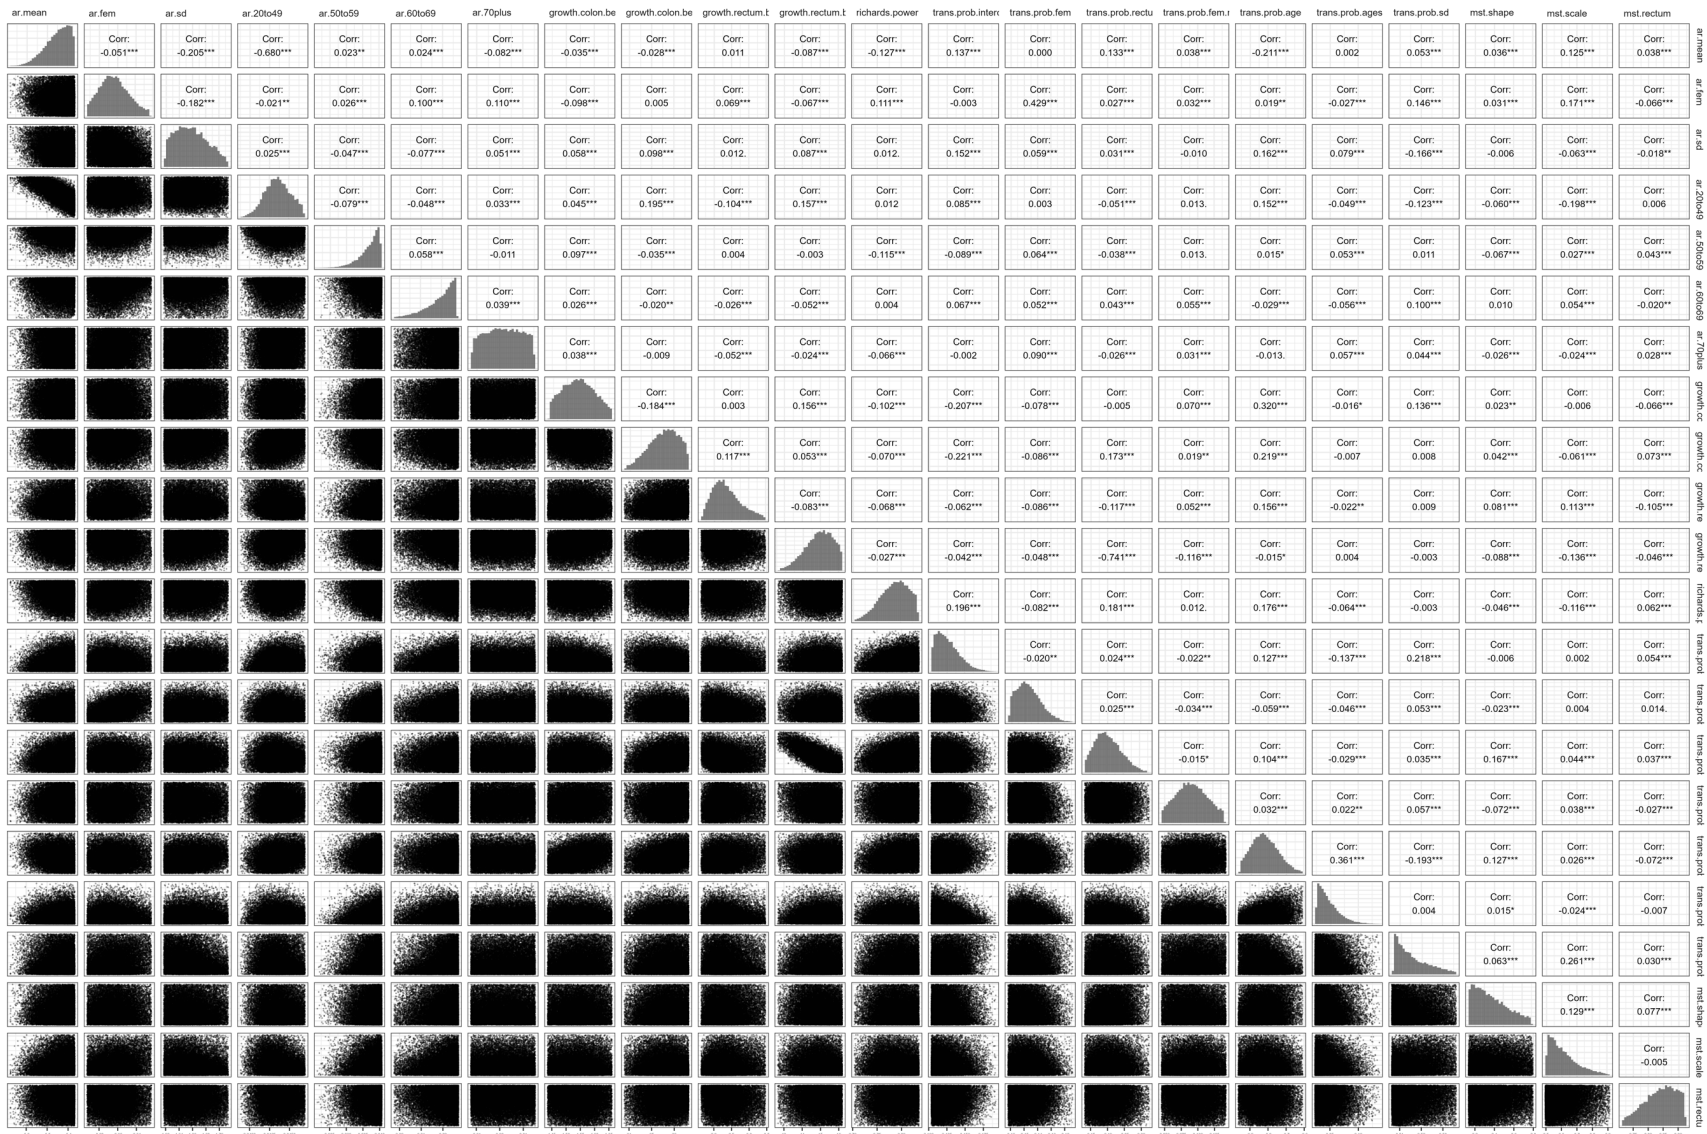

Figure S5. Internal validation for CRC models.

*S5.1 SimCRC*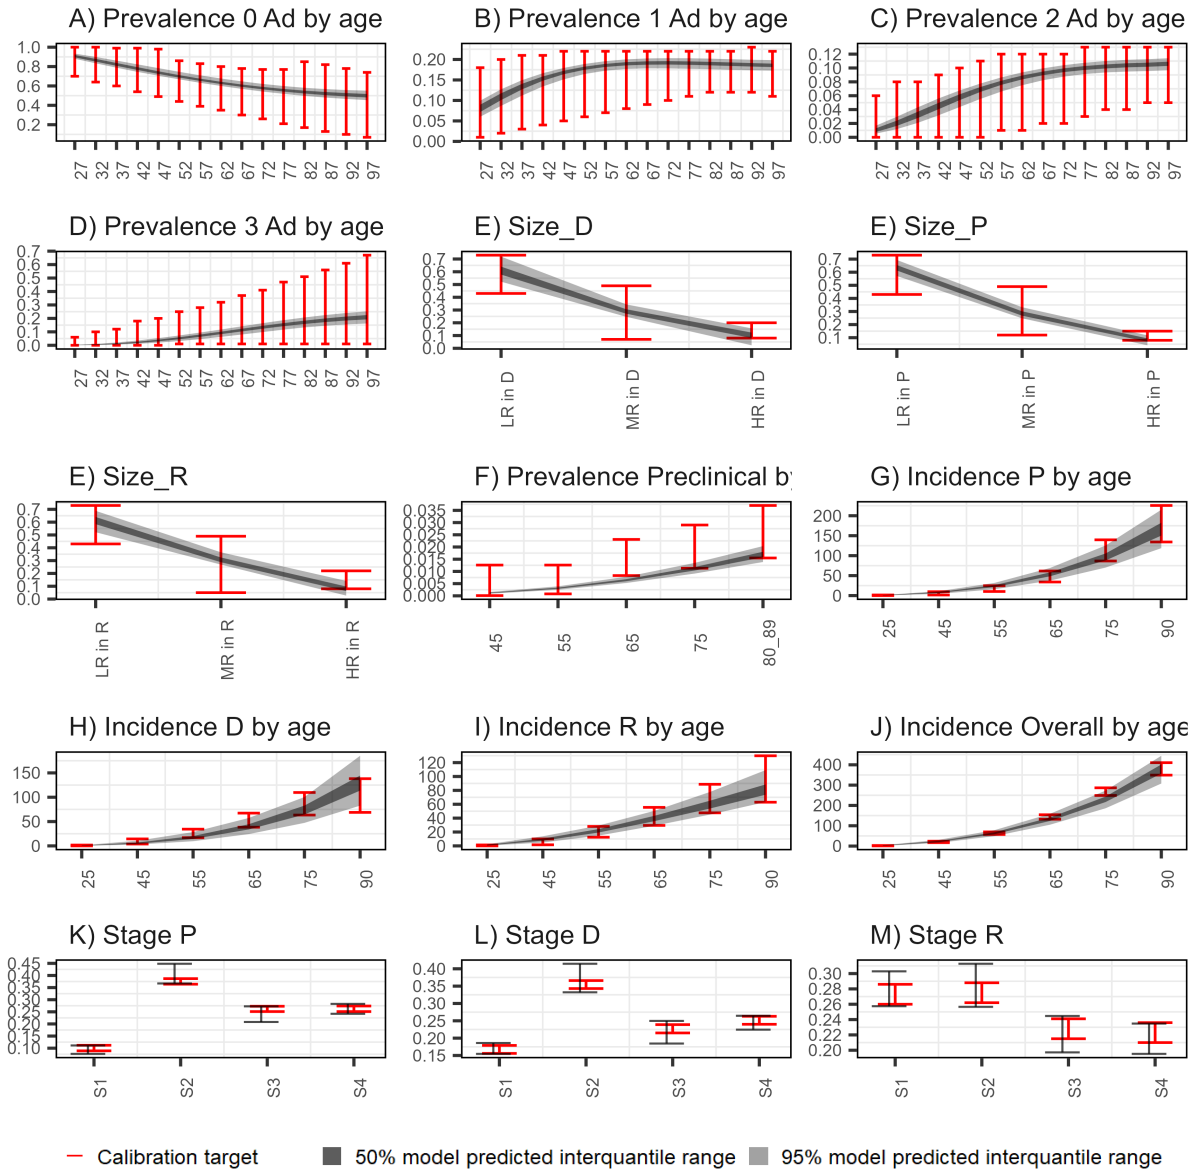

## S5.2 MISCAN-Colon

### BayCANN - MISCAN

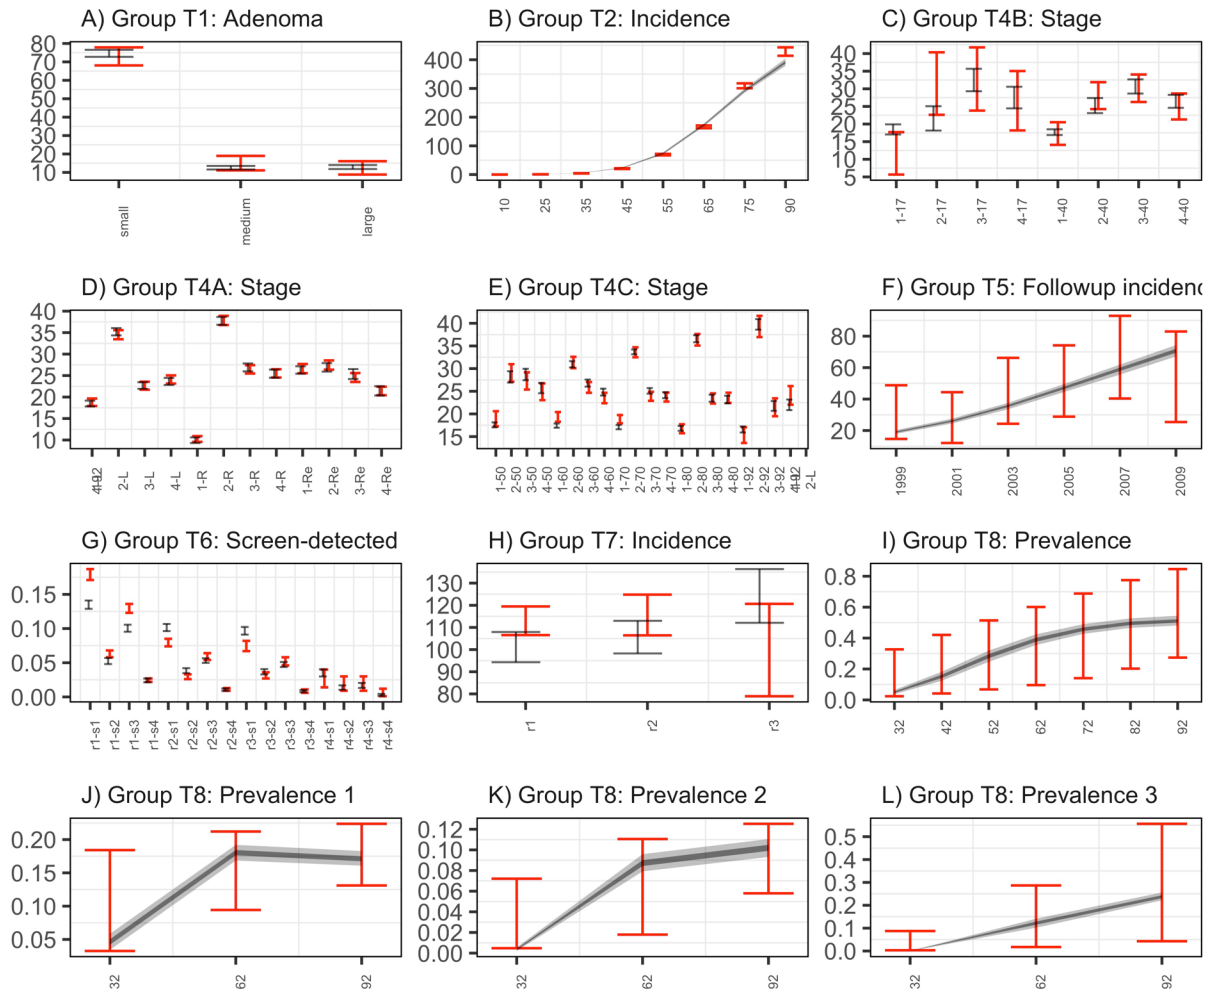

— Calibration target    ■ 50% model predicted interquantile range    ■ 95% model predicted interquantile range



### S5.3 CRC-SPIN

#### BayCANN - CRC SPIN

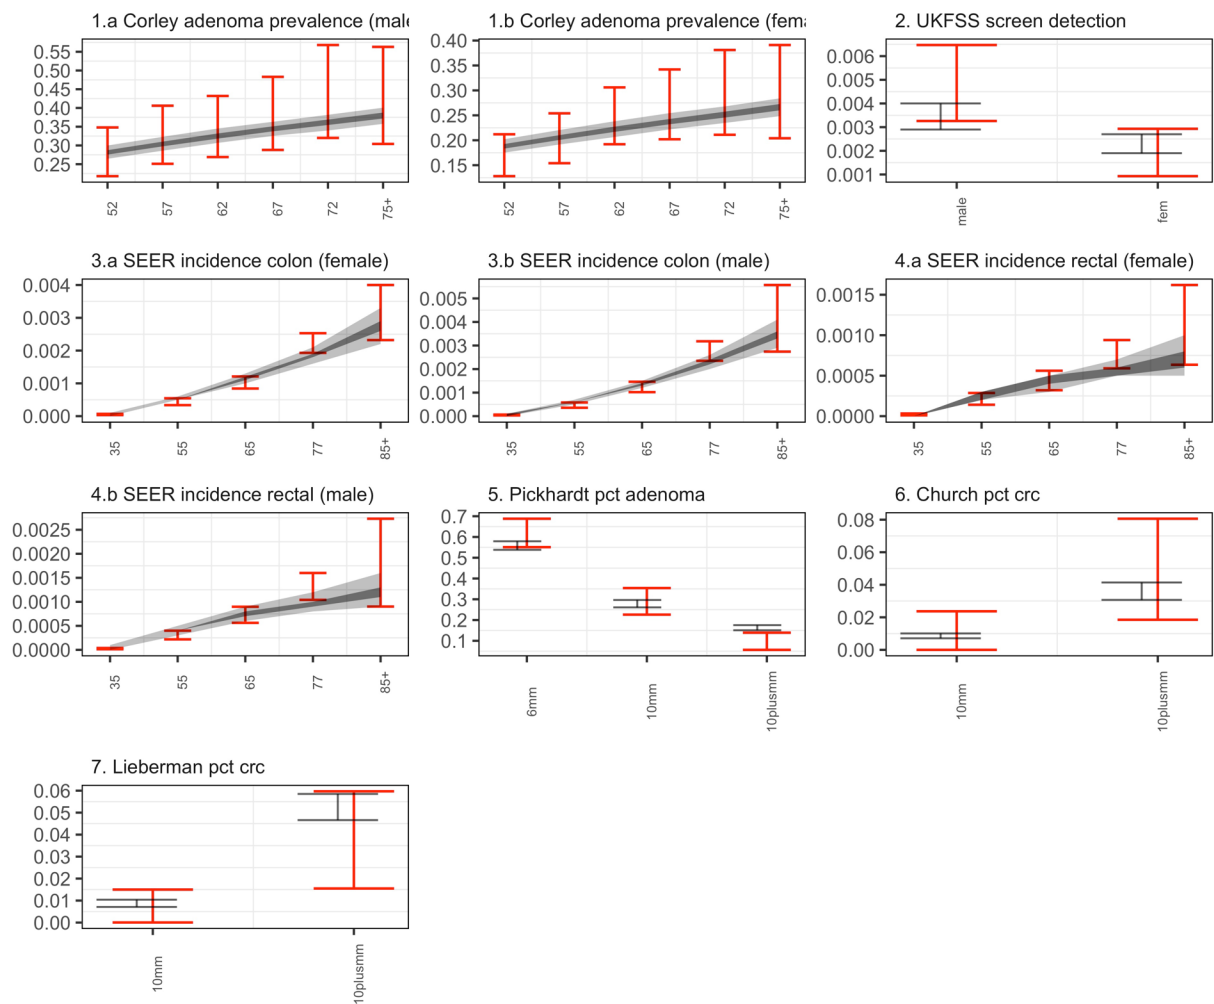

— Calibration target    ■ 50% model predicted interquantile range    ■ 95% model predicted interquantile range

**Figure S6. Prediction performance of model outputs for the three CRC models ( inputs and outputs are scaled within -1 to 1).**

### *S6.1 SimCRC*

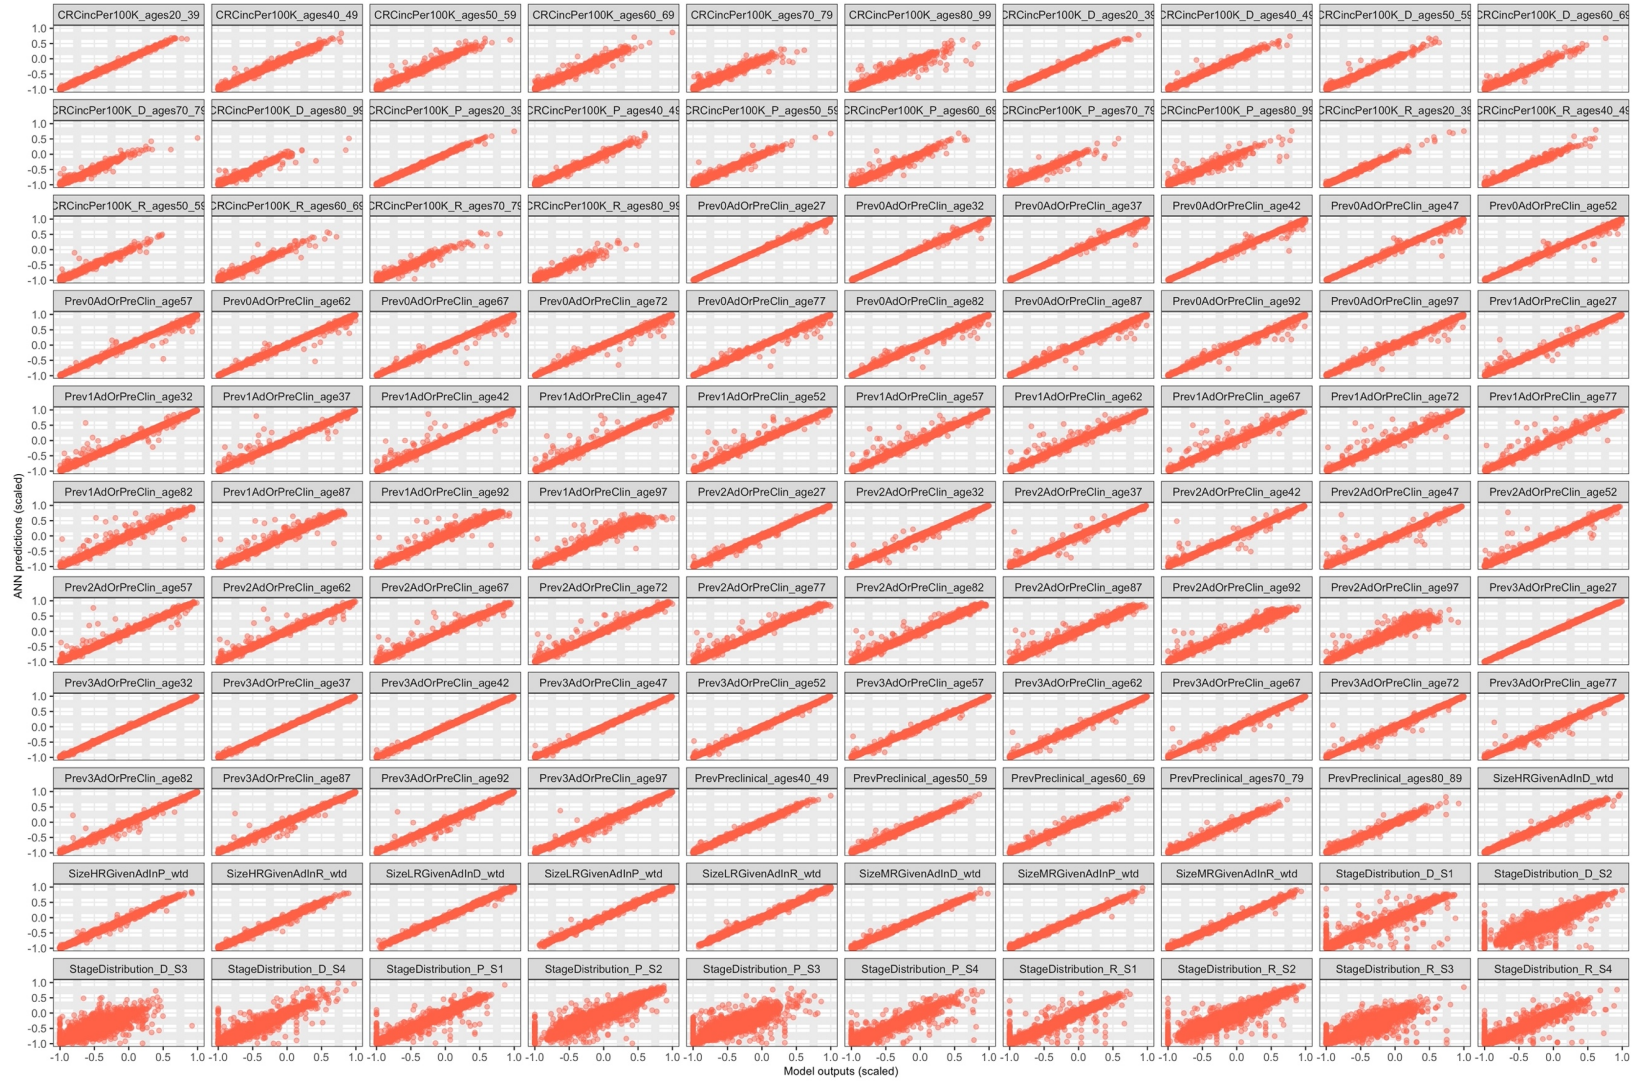

## S6.2 MISCAN-Colon

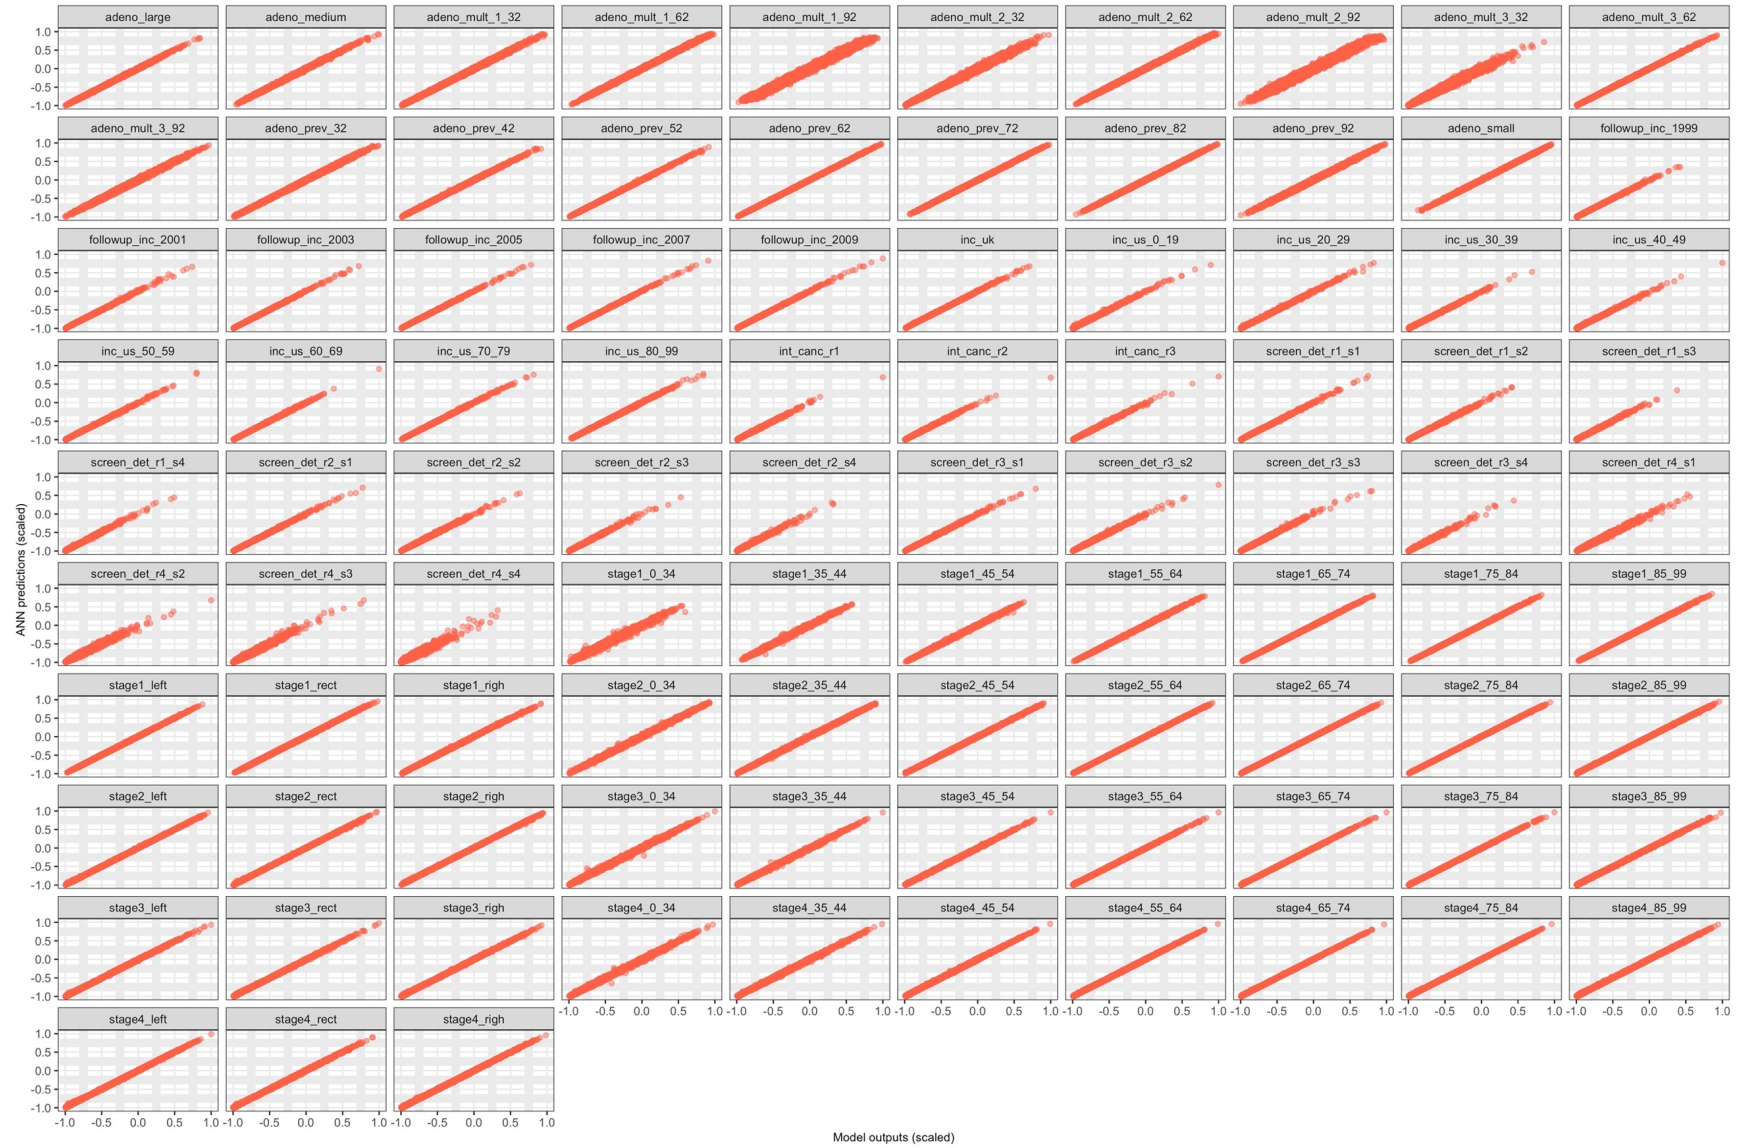



### S6.3 CRC-SPIN

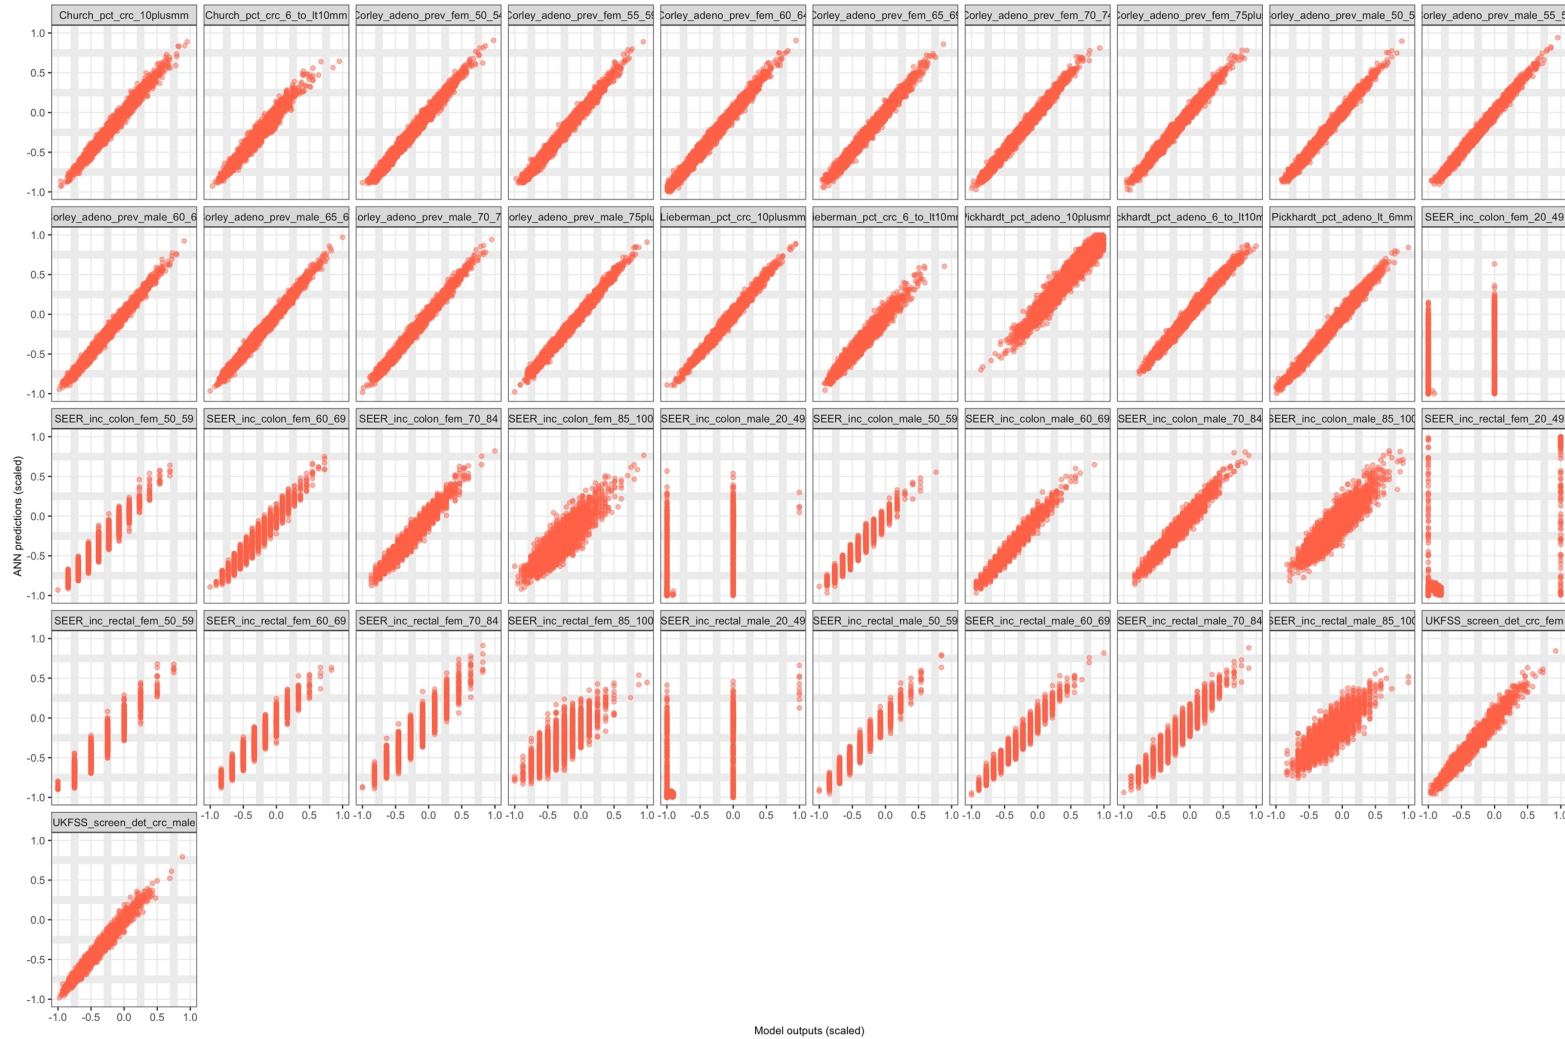

Note: The early stop LHS draws for CRC-SPIN resulted in few outputs in low incidence levels, particularly in the age range of 20-49, as shown in the third and fourth row of the S6.3 figure.

**Figure S7. ANN training time vs. total parameters in the ANN**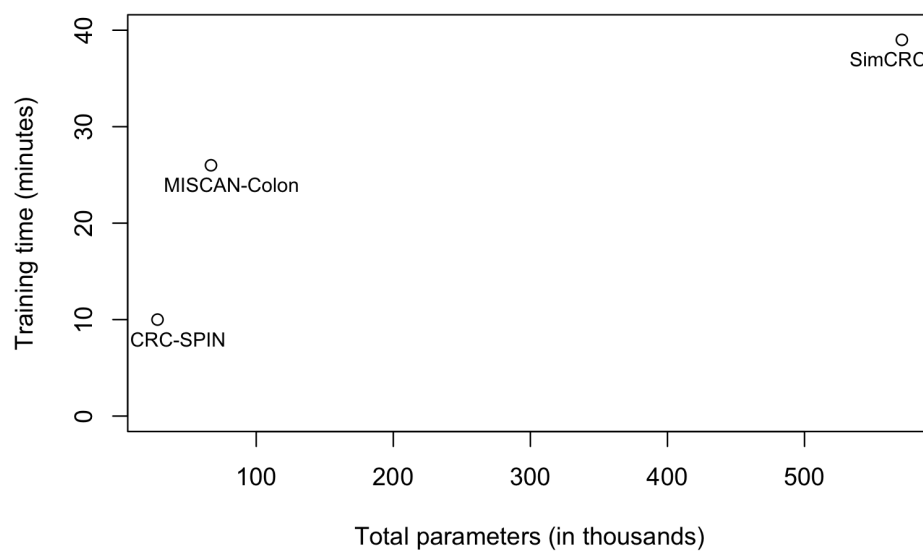**ANN structure and training time**

|              | Inputs | Hidden<br>layers | Hidden<br>nodes | Outputs | Total<br>ANN<br>trained<br>parameters | Time<br>(minutes) |
|--------------|--------|------------------|-----------------|---------|---------------------------------------|-------------------|
| SimCRC       | 30     | 4                | 360             | 110     | 571,070                               | 39                |
| MISCAN-Colon | 37     | 4                | 114             | 93      | 67,467                                | 26                |
| CRC-SPIN     | 22     | 1                | 140             | 41      | 28,741                                | 10                |

**Table S8. Calibrated parameters for the three CRC CISNET Models****Table S8.1 SimCRC**

| <b>Parameter</b>               | <b>Description</b>                                                             |
|--------------------------------|--------------------------------------------------------------------------------|
| AdOnset_Weibull_Shape          | Shape parameter for the risk of developing an adenoma                          |
| AdOnset_Weibull_Scale          | Scale parameter for the risk of developing an adenoma                          |
| AdOnset_PersonRisk_Gamma_Alpha | Individual risk parameter                                                      |
| AdGrowthMult_Variance          | Variance for adenoma growth function                                           |
| AdGrowthMult_ScaleTerm         | Scale for adenoma growth function                                              |
| Janoschek_Inflexion            | Inflexion parameter for adenoma growth function                                |
| Janoschek_Rate_P               | Rate parameter for growth function for an adenoma in the proximal colon        |
| Janoschek_Rate_D               | Rate parameter for growth function for an adenoma in the distal colon          |
| Janoschek_Rate_R               | Rate parameter for growth function for an adenoma in the rectum                |
| CancerOnset_Weibull_Shape_P    | Shape parameter for cancer onset function for an adenoma in the proximal colon |
| CancerOnset_Weibull_Shape_D    | Shape parameter for cancer onset function for an adenoma in the distal colon   |
| CancerOnset_Weibull_Shape_R    | Shape parameter for cancer onset function for an adenoma in the rectum         |
| CancerOnset_Weibull_Scale_P    | Scale parameter for cancer onset function for an adenoma in the proximal colon |
| CancerOnset_Weibull_Scale_D    | Scale parameter for cancer onset function for an adenoma in the distal colon   |
| CancerOnset_Weibull_Scale_R    | Scale parameter for cancer onset function for an adenoma in the rectum         |
| Exp_Rate_PreclinProg_P         | Rate parameter for progression of a preclinical cancer in the proximal colon   |
| Exp_Rate_PreclinProg_D         | Rate parameter for progression of a preclinical cancer in the distal colon     |
| Exp_Rate_PreclinProg_R         | Rate parameter for progression of a preclinical cancer in the rectum           |
| pSxDetS1_P                     | Probability of detecting a stage I proximal colon cancer by symptoms           |
| pSxDetS1_D                     | Probability of detecting a stage I distal colon cancer by symptoms             |
| pSxDetS1_R                     | Probability of detecting a stage I rectal cancer by symptoms                   |
| pSxDetS2_P                     | Probability of detecting a stage II proximal colon cancer by symptoms          |
| pSxDetS2_D                     | Probability of detecting a stage II distal colon cancer by symptoms            |
| pSxDetS2_R                     | Probability of detecting a stage II rectal cancer by symptoms                  |
| pSxDetS3_P                     | Probability of detecting a stage III proximal colon cancer by symptoms         |
| pSxDetS3_D                     | Probability of detecting a stage III distal colon cancer by symptoms           |
| pSxDetS3_R                     | Probability of detecting a stage III rectal cancer by symptoms                 |
| pSxDetS4_P                     | Probability of detecting a stage IV proximal colon cancer by symptoms          |
| pSxDetS4_D                     | Probability of detecting a stage IV distal colon cancer by symptoms            |
| pSxDetS4_R                     | Probability of detecting a stage IV rectal cancer by symptoms                  |

**Table S8.2 MISCAN-Colon**

| <b>Parameter</b>      | <b>description</b>                                                                                                                        |
|-----------------------|-------------------------------------------------------------------------------------------------------------------------------------------|
| hazard_variance       | The variance of the Gamma distribution.                                                                                                   |
| hazard_mean_uk        | Relative risk in the UK compared to the US.                                                                                               |
| hazard_mean_nl        | Relative risk in the Netherlands compared to the US.                                                                                      |
| age_factors_k         | The value of the horizontal asymptote of the generalized logistic function.                                                               |
| age_factors_logb      |                                                                                                                                           |
| age_factors_logv      | A measure for the slope at the point of inflection of the generalized logistic function and the line symmetry in the point of inflection. |
| age_factors_M         | The location of the point of inflection (x-coordinate).                                                                                   |
| non_progr_0           | The probability that an adenoma is non-progressive at age 0                                                                               |
| non_progr_45          | The probability that an adenoma is non-progressive at age 45                                                                              |
| non_progr_65          | The probability that an adenoma is non-progressive at age 65                                                                              |
| non_progr_100         | The probability that an adenoma is non-progressive at age 100                                                                             |
| small_progr           | The probability that a progressive adenoma does not grow larger than 10mm before it becomes a preclinical cancer                          |
| small_non_progr       | The probability that a non-progressive adenoma never grows larger than 10mm.                                                              |
| dwll_pcl_shape        | Determines the shape of the Weibull distribution for all preclinical cancer states.                                                       |
| dwll_adn_factor       | The ratios are multiplied with this parameter to determine the mean dwell time for each adenoma state.                                    |
| dwll_pcl1             | Scale of the Weibull distribution for the preclinical cancer state 1                                                                      |
| dwll_pcl2             | Scale of the Weibull distribution for the preclinical cancer state 2                                                                      |
| dwll_pcl3             | Scale of the Weibull distribution for the preclinical cancer state 3                                                                      |
| dwll_pcl4             | Scale of the Weibull distribution for the preclinical cancer state 4                                                                      |
| trans_clin_loc_12     | The probability that a preclinical cancer starts showing clinical symptoms in stage 1 for rectal cancers.                                 |
| trans_clin_loc_124    | The probability that a preclinical cancer starts showing clinical symptoms in stage 2 for cancers in the left colon.                      |
| trans_clin_loc_14     | The probability that a preclinical cancer starts showing clinical symptoms in stage 1 for cancers in the right colon                      |
| trans_clin_loc_22     | The probability that a preclinical cancer starts showing clinical symptoms in stage 2 for rectal cancers.                                 |
| trans_clin_loc_224    | The probability that a preclinical cancer starts showing clinical symptoms in stage 2 for cancers in the left colon.                      |
| trans_clin_loc_24     | The probability that a preclinical cancer starts showing clinical symptoms in stage 2 for cancers in the right colon                      |
| trans_clin_loc_32     | The probability that a preclinical cancer starts showing clinical symptoms in stage 3 for rectal cancers.                                 |
| trans_clin_loc_324    | The probability that a preclinical cancer starts showing clinical symptoms in stage 3 for cancers in the left colon.                      |
| trans_clin_loc_34     | The probability that a preclinical cancer starts showing clinical symptoms in stage 3 for cancers in the right colon                      |
| trans_clin_age_Maxp1  | For stage 1 cancers, the transition probability is represented by quadratic function of age                                               |
| trans_clin_age_Scale1 | Scale factor 1 for transition probability from stage 1                                                                                    |

|                         |                                                              |
|-------------------------|--------------------------------------------------------------|
| trans_clin_age_Scale2   | Scale factor 2 for transition probability from stage 1       |
| trans_clin_age_Pcl2100  | Transition probabilities to from stage 2 clinical at age 100 |
| trans_clin_age_Pcl20    | Transition probabilities to from stage 2 clinical at age 0   |
| trans_clin_age_Pcl3100  | Transition probabilities from stage 3 to clinical at age 100 |
| trans_clin_age_Pcl30    | Transition probabilities from stage 3 to clinical at age 0   |
| sensitivity_47FIT_a     | The sensitivity of the FIT short before clinical diagnosis   |
| sensitivity_47FIT_ratio | The sensitivity of the FIT long before clinical diagnosis    |



**Table S8.3 CRC-SPIN**

| <b>Parameter</b>      | <b>description</b>               |
|-----------------------|----------------------------------|
| ar.mean               | Baseline log-risk                |
| ar.sd                 | Standard dev., baseline log-risk |
| ar.fem                | Female                           |
| ar.20to49             | Age effect                       |
| ar.50to59             | Age effect                       |
| ar.60to69             | Age effect                       |
| ar.70plus             | Age effect                       |
| growth.colon.beta1    | Shape, colon                     |
| growth.colon.beta2    | Scale, colon                     |
| growth.rectum.beta1   | Shape, rectum                    |
| growth.rectum.beta2   | Scale, rectum                    |
| richards.power        | Richard's power                  |
| trans.prob.intercept  | Intercept                        |
| trans.prob.fem        | Female (vs male)                 |
| trans.prob.rectum     | Rectal (vs colon)                |
| trans.prob.fem.rectum | Female and Rectal                |
| trans.prob.age        | Age at initiation                |
| trans.prob.agesq      | Age at initiation sq.            |
| trans.prob.sd         | Standard dev., Trans. Prob.      |
| mst.scale             | Scale                            |
| mst.shape             | Shape                            |
| mst.rectum            | Rectal (vs colon)                |
